# Supplementary material
Source: ML conference proceedings conference paper supplement (https://openreview.net/forum?id=wlB56RZ2df)
Supplement: supplementary_material [file attachment]

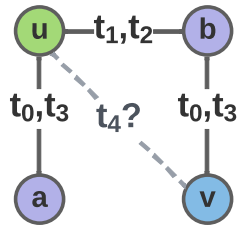

Links arrive in the order of  $t_0 < t_1 < t_2 < t_3$

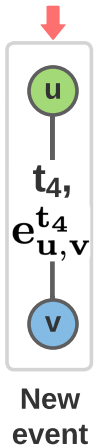

Backtrack

Sample

**CPU** Operations for *backward sampling* in traditional methods (No longer needed in NLB).

Traditional backward sampling

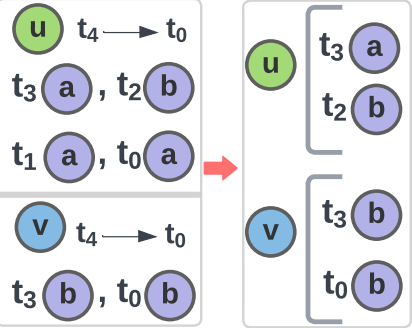

Aggregate

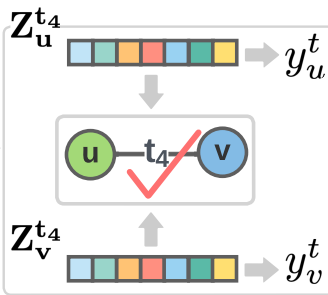

Aggregate

**GPU** Operations that are common to both traditional method and NLB.

Proposed forward sampling

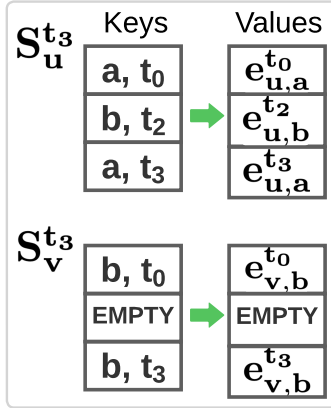

New event

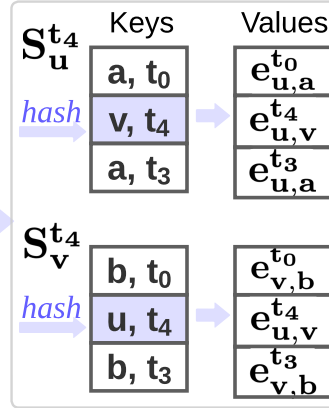

**GPU** Operations for NLB (Inference is done without the *sampling* latency. *Down-sampled temporal neighbors* are prepared *forward* for future use).
